# Supplementary material for: Cross-Species Comparison of the Pan-RAF Inhibitor LY3009120’s Anti-Tumor Effects in Equine, Canine, and Human Malignant Melanoma Cell Lines
Source: MDPI journal article supplement (doi:10.3390/genes15020202), 2024-02-03
Supplement: s1 [file s1]

**Supplement Table S1. Summary of molecular/genetic evaluation to date in canine and equine melanomas.**

| Gene (Canine) /Total%        | Site/Total %                | Investigative approach                             | Specimen                                  | Affected/ Examined | Mutation                                     | Reference                                              |
|------------------------------|-----------------------------|----------------------------------------------------|-------------------------------------------|--------------------|----------------------------------------------|--------------------------------------------------------|
| <i>NRAS</i><br>25/311 (8.0%) | Mucosal<br>11/115<br>(9.6%) | <i>NRAS</i> Exon 2 sequencing                      | Tumors and cell lines (Jones)             | 1/16 (6.25%)       | Q61R                                         | Fowles JS, 2015 [4]                                    |
|                              |                             | Sanger sequencing                                  | Tumors and cell lines (UCDK9M5 and Jones) | 4/35 (11.4%)       | Q61                                          | Wei BR, 2016 [44]                                      |
|                              |                             | WES                                                | Tumors                                    | 7/65 (11.0%)       | 4 cases with Q61H/R/K<br>3 cases with G12A/D | Wong K, 2019 [7]                                       |
|                              | Digit<br>11/169<br>(6.5%)   | Sanger sequencing                                  | Tumors                                    | 2/83 (2.4%)        | Exon 2 Codon 12                              | Conrad D, 2022                                         |
|                              |                             | Sanger sequencing                                  | Tumors                                    | 9/86 (10.5%)       | Exon 3 Codon 61                              |                                                        |
|                              | Skin                        | Codon 61 sequence                                  | Tumors                                    | 2/16 (12.5%)       | Exon 2 Codon 61                              | Mayr B, 2003 [45]                                      |
|                              | Unknown                     | PCR of multiple codons                             | Tumors                                    | 1/11 (9.1%)        | Exon 1 Codon 22                              | Murua Escobar H, 2004 [46]                             |
| <i>BRAF</i><br>5/272(1.8%)   | Mucosal<br>4/180<br>(2.2%)  | Orthologous codon 599, exon 15, clone and sequence | Tumor and Cell lines                      | 0/68 (0%)          | All absent                                   | Fowles JS, 2015<br>Wei BR, 2016<br>Shelly S, 2005 [47] |
|                              |                             | <i>BRAF</i> exon 15 sequencing                     | Tumors                                    | 2/47 (4.3%)        | V450E                                        | Mochizuki H, 2015 [48]                                 |
|                              |                             | WES                                                | Tumors                                    | 2/65 (3.1%)        | G457A, D582G                                 | Wong K, 2019                                           |
|                              | Skin                        | <i>BRAF</i> exon 15 sequencing                     | Tumors                                    | 1/6 (17%)          | V450E                                        | Mochizuki H, 2015                                      |

|                                                                                                                                 | Digit                                        | Digital droplet PCR (ddPCR) | Tumors   | 0/86 (0%)         | BRAF V595E absent                                      | Conrad D, 2022 |
|---------------------------------------------------------------------------------------------------------------------------------|----------------------------------------------|-----------------------------|----------|-------------------|--------------------------------------------------------|----------------|
| <i>KRAS</i><br>27/206 (13.1%)                                                                                                   | Digit                                        | Sanger sequencing           | Tumors   | 22/86 (25.6%)     | Exon 2 codons 12&13                                    | Conrad D, 2022 |
|                                                                                                                                 |                                              | Sanger sequencing           | Tumors   | 2/55 (3.6%)       | Exon 3 codon 61                                        |                |
|                                                                                                                                 | Mucosal                                      | WES                         | Tumors   | 3/65 (4.6%)       | G12D/V, G13D                                           | Wong K, 2019   |
| <i>c-kit</i><br>16/70 (22.9%)                                                                                                   | Digit                                        | Sanger sequencing           | Tumors   | 16/70 (23%)       | Exon 11 mutations<br>Single nucleotide polymorphism    | Conrad D, 2022 |
| Gene (Equine) /Total%                                                                                                           | Site                                         | Investigative approach      | Specimen | Affected/Examined | Mutation                                               | Reference      |
| <i>NRAS</i><br>5/60 (8.3%)                                                                                                      | Cutaneous                                    | WES                         | Tumors   | 1/32 (3.1%)       | Q61R                                                   | Wong K, 2019   |
|                                                                                                                                 | Mucosal-like/<br>Mucocutaneous               |                             |          | 4/28 (14%)        | 3 cases with Q61R<br>1 case with G12A                  |                |
| <i>BRAF</i><br>2/28 (7.1%)                                                                                                      | Mucosal-like/<br>Mucocutaneous               |                             |          | 2/28 (7.1%)       | V594E,<br>P321L and S56L in<br>vulvar tumor<br>HD0021a |                |
| <i>KIT</i><br>1/28 (3.6%)                                                                                                       |                                              |                             |          | 1/28 (3.6%)       | S339F                                                  |                |
| <i>KRAS</i><br>0/62 (0%)                                                                                                        | Cutaneous<br>/Mucosal-like/<br>Mucocutaneous |                             |          | 0/62 (0%)         | Wild type                                              |                |
| Table update based on David Conrad et al [5], R Mark Simpson et al [6], and Kim Wong et al [7].<br>WES: Whole exome sequencing. |                                              |                             |          |                   |                                                        |                |



**Supplement Figure S1. Morphology of all human, canine, and equine melanoma cell lines by microscopy (400x magnification) after 72 hours seeding.**

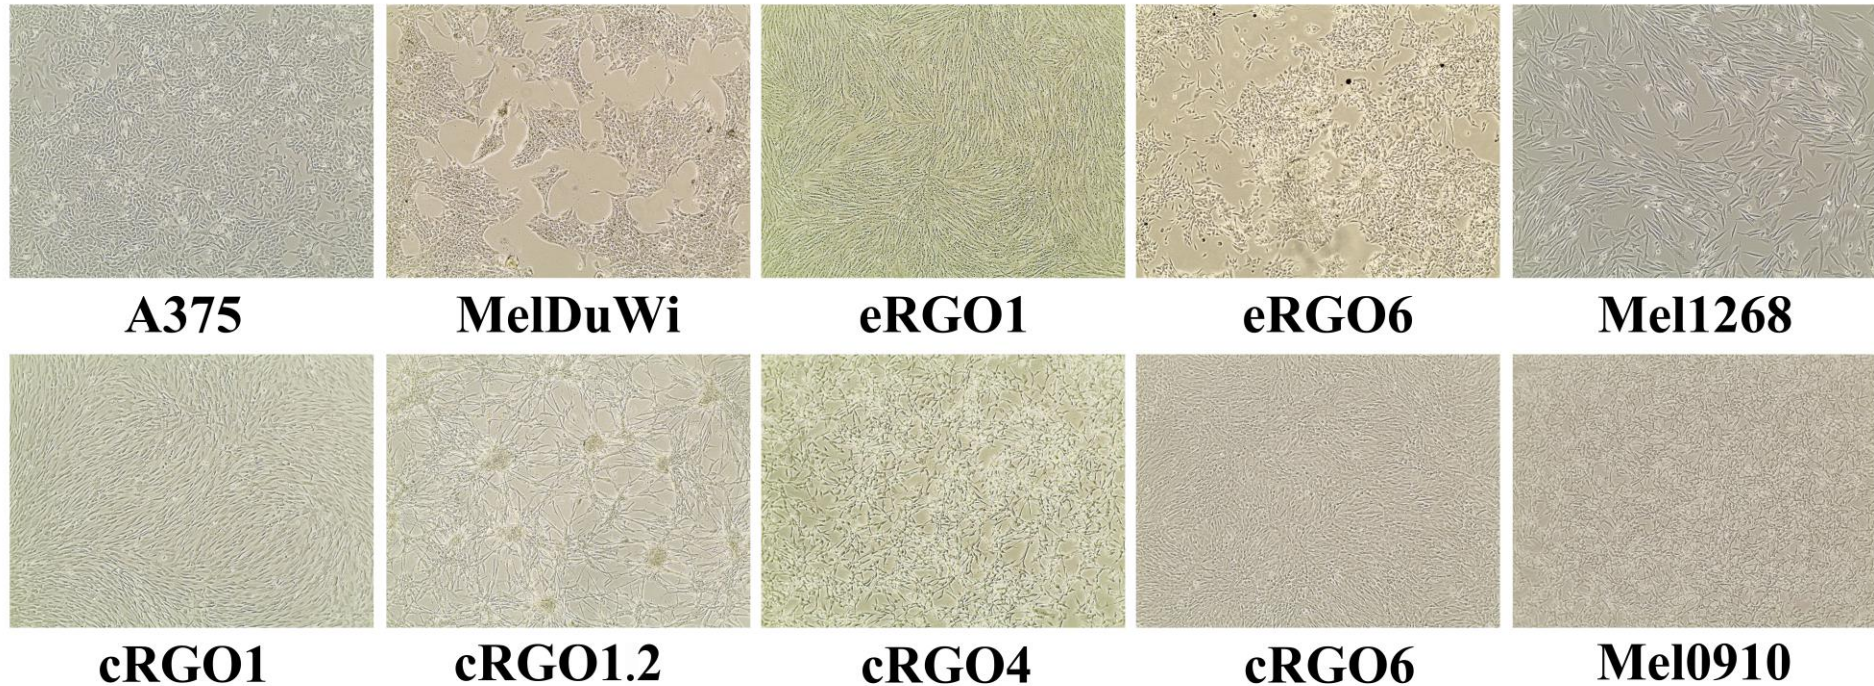

A375 (derived from a skin primary human malignant melanoma, carrying the *BRAF* V600E mutation); MelDuWi (equine cutaneous malignant melanoma, harbor the *KRAS* p.Q61H mutation); eRGO1 (equine cutaneous malignant melanoma); eRGO6 (equine liver metastasis melanoma); Mel1268 (canine primary oral malignant melanoma); Mel0910 (canine primary cutaneous malignant melanoma); cRGO1 (canine primary predominately amelanotic malignant melanoma, carry *NRAS* p.G13R); cRGO1.2 (canine left mandibular lymph node metastasis, carry *NRAS* p.G13R); cRGO4 (canine primary oral malignant melanoma); cRGO6 (canine amelanotic oral malignant melanoma); Compared to other melanoma cell lines, metastases-derived cell line cRGO1.2 displayed a more fibroblastic, bipolar and elongated morphology.

**Supplement Figure S2. Proliferation, biomass, and metabolic activity in ten melanoma cell lines after 48h and 72h exposure to LY3009120.**

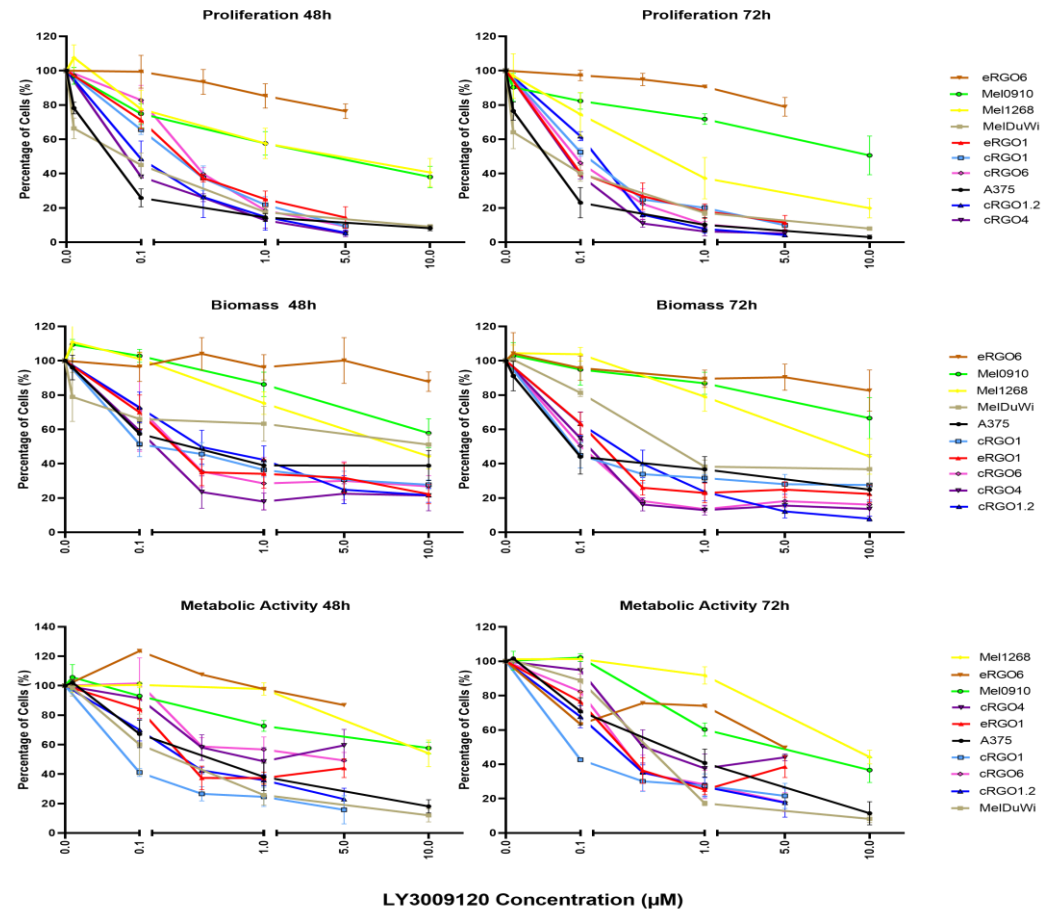

Except for liver metastasis equine melanoma cells eRGO6, LY3009120 acted dose-dependent and time-dependent in all melanoma cell lines. cRGO1.2, cRGO4, cRGO6, and eRGO1 showed a higher inhibition as the positive control A375 in terms of the reduced biomass and metabolic activity effect at 1  $\mu$ M. cRGO1.2 and cRGO4 showed a higher inhibition as the positive control A375 in terms of the antiproliferation effect at 1  $\mu$ M. In metabolic activity, eRGO1 and cRGO4 showed a rebound after the high concentration of 1  $\mu$ M.
